# Supplementary material for: Epigallocatechin Gallate Affects the Structure of Chromatosomes, Nucleosomes and Their Complexes with PARP1
Source: MDPI journal article supplement (doi:10.3390/ijms241814187), 2023-09-16
Supplement: s1 [file s1]

Supplementary materials to

# Epigallocatechin gallate affects the structure of chromatosomes, nucleosomes and their complexes with PARP1

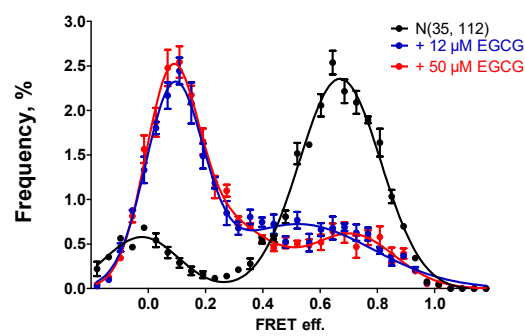

**Figure S1.** Frequency distributions of nucleosomes N(35, 112) by  $E_{PR}$  value in the absence and presence of 12 and 50  $\mu$ M EGCG (mean $\pm$ SEM, n=3).

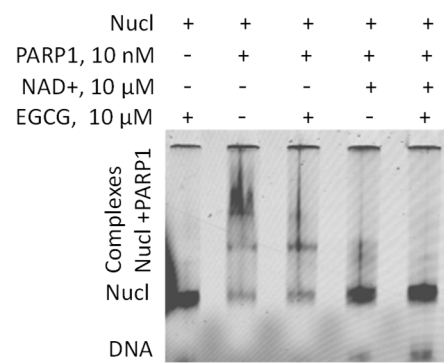

**Figure S2.** Analysis of the complexes of nucleosomes with PARP1, EGCG and NAD<sup>+</sup> by non-denaturing PAGE.

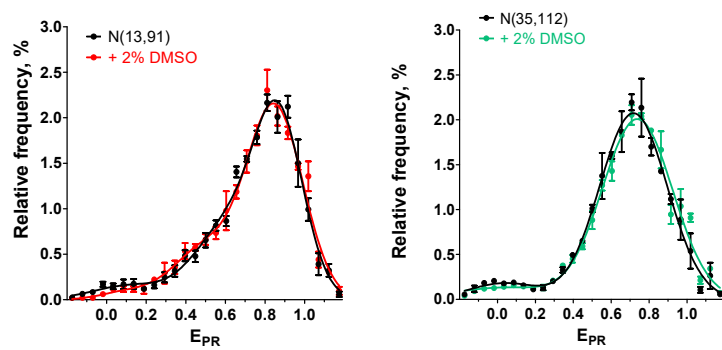

**Figure S3.** Frequency distributions of nucleosomes by  $E_{PR}$  value in the absence and presence of 2% DMSO (mean $\pm$ SEM, n=3).
